# Supplementary material
Source: PubMed Central journal article supplement (PMC5097012)

Figure 2b

IB: HA

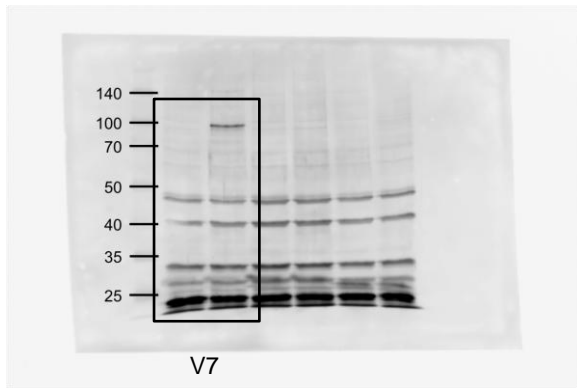

IB: Zuo1

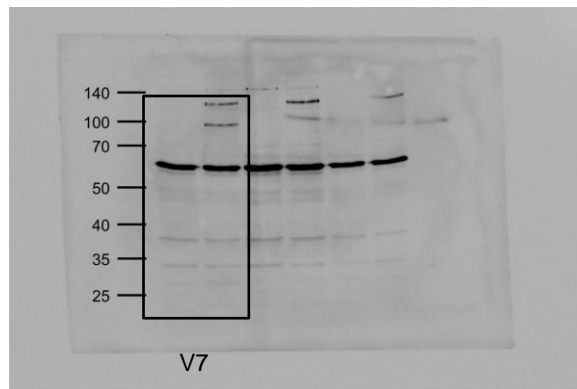

IB: HA

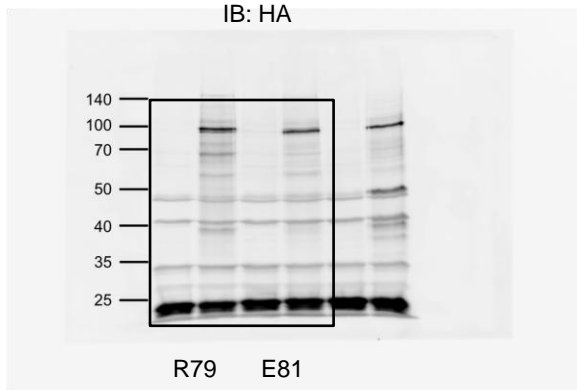

IB: Zuo1

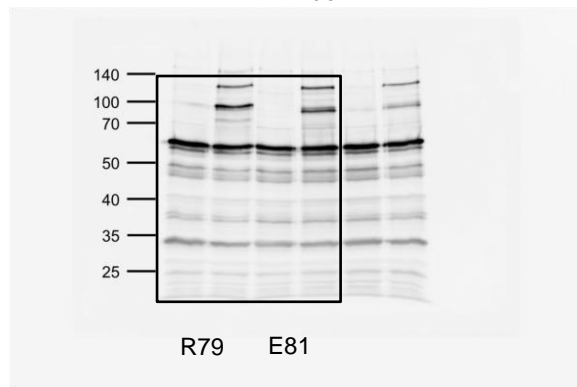

Figure 2c

IB: Zuo1

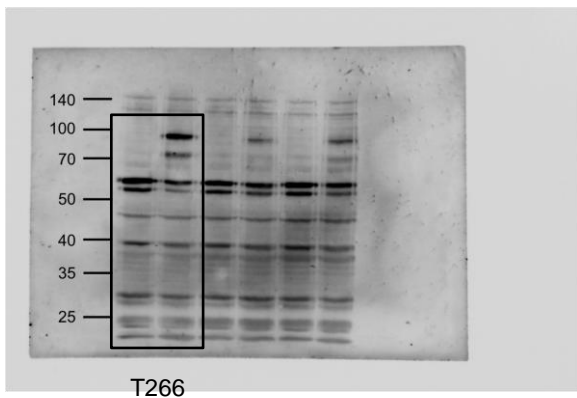

IB: HA

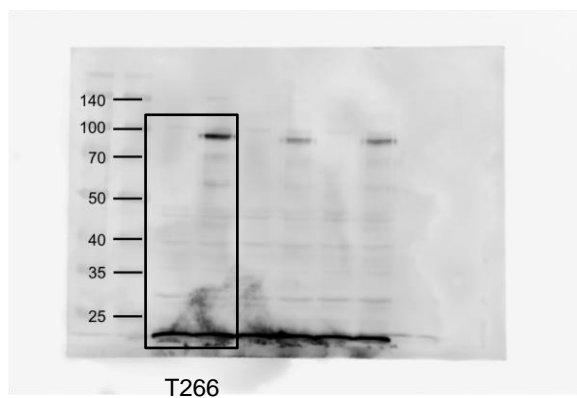

IB: Zuo1

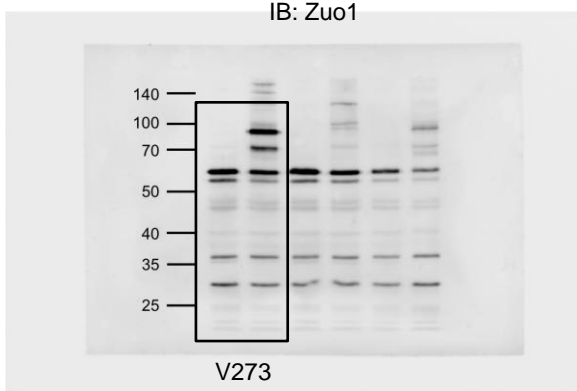

IB: HA

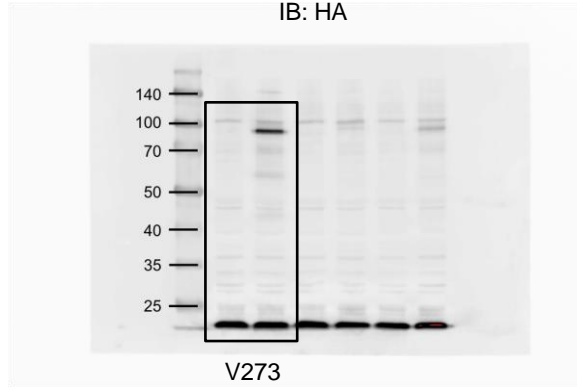

Figure 2d

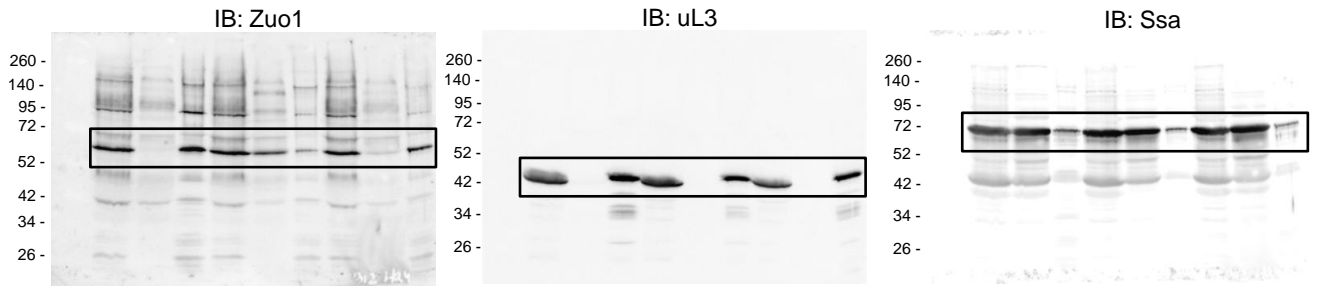

Figure 3a

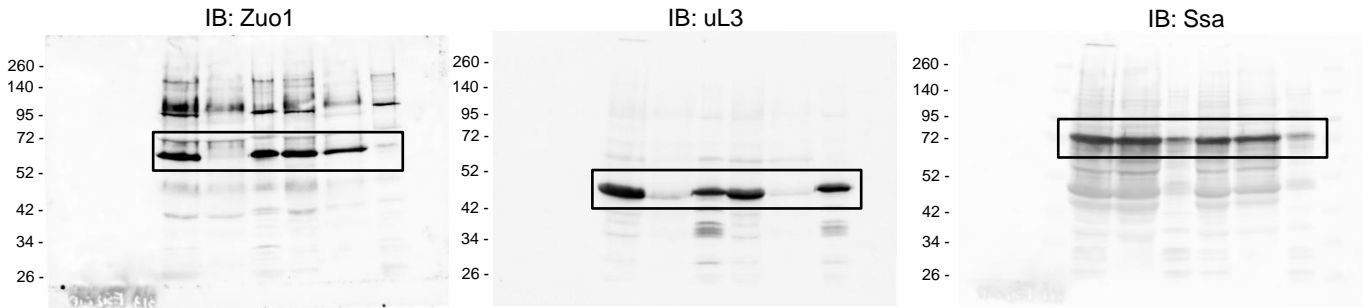

Figure 3b

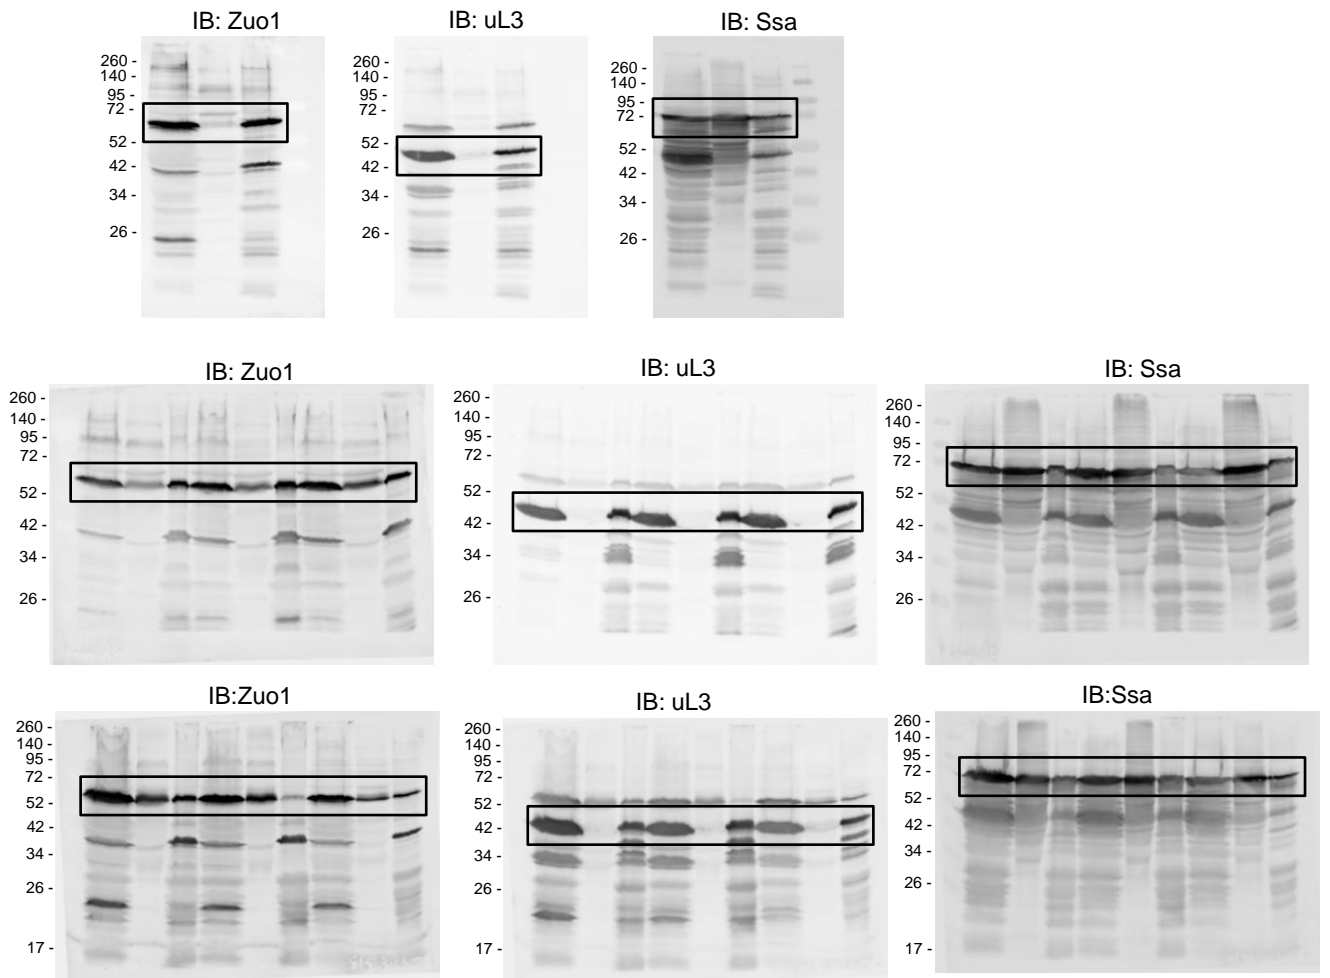

Figure 3c

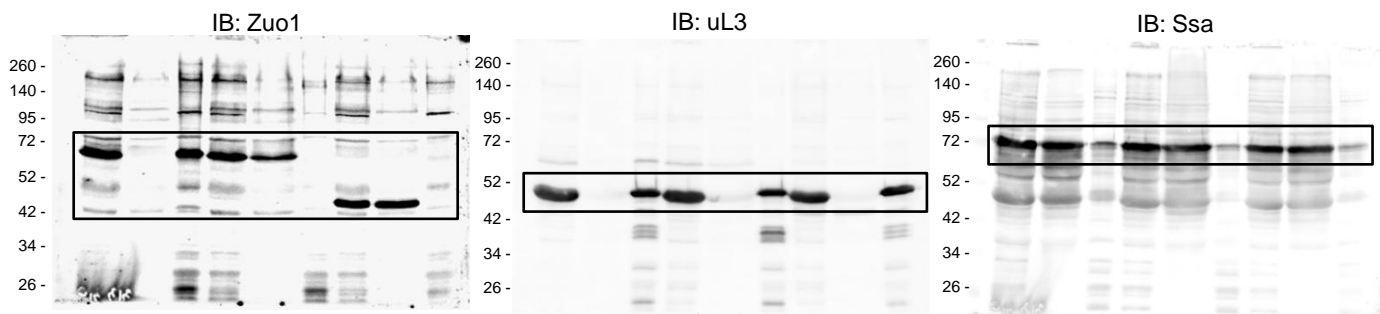

Figure 4b

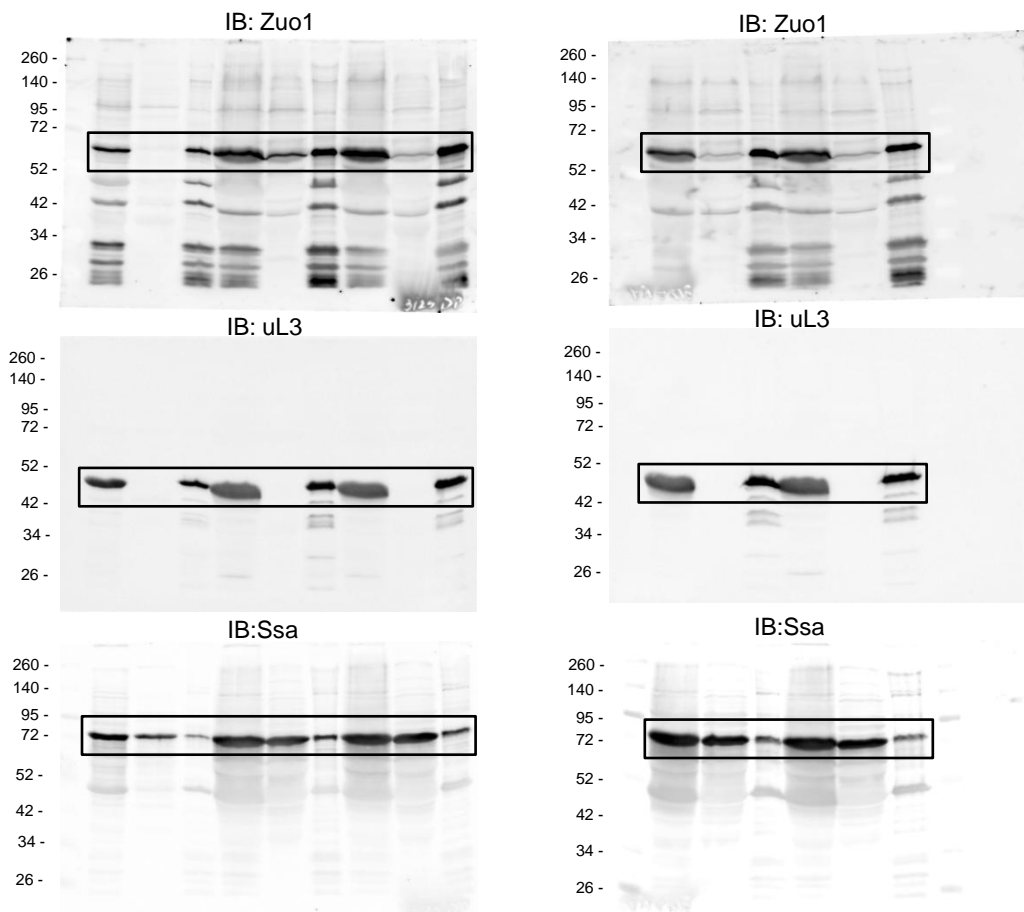

## Supplementary Figure 2b

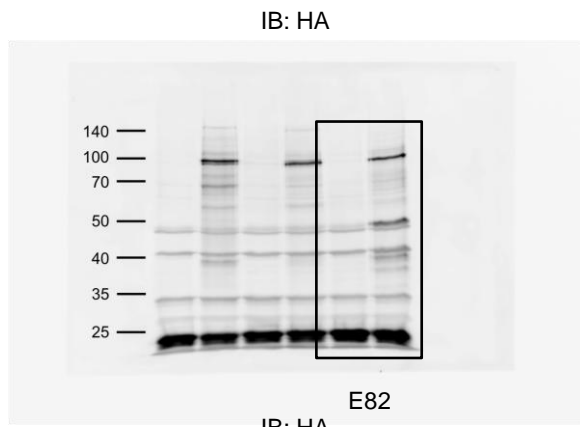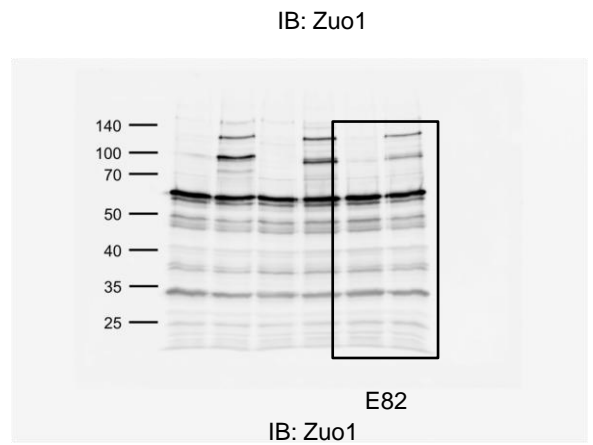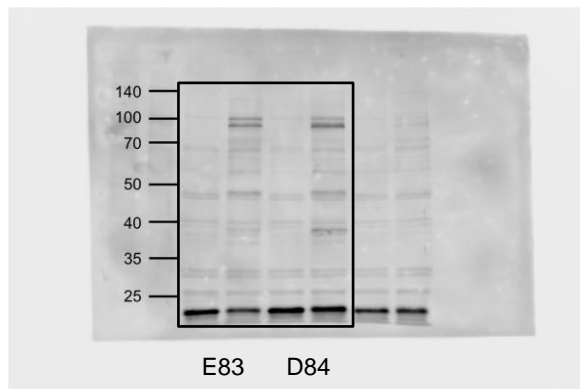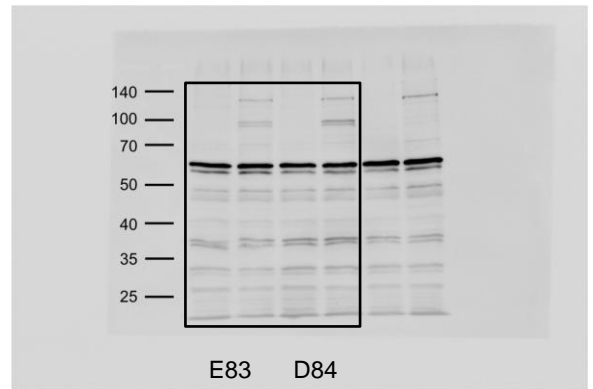

## Supplementary Figure 2c

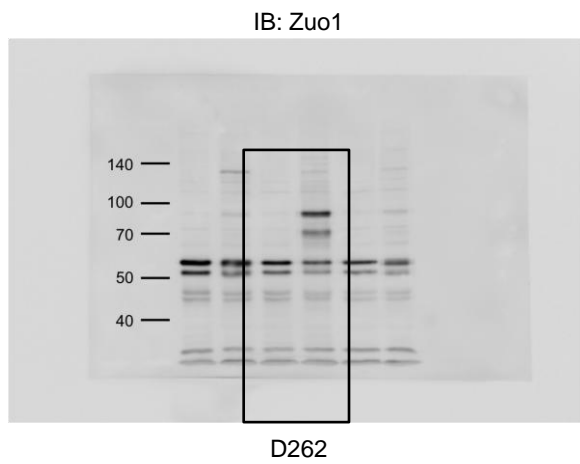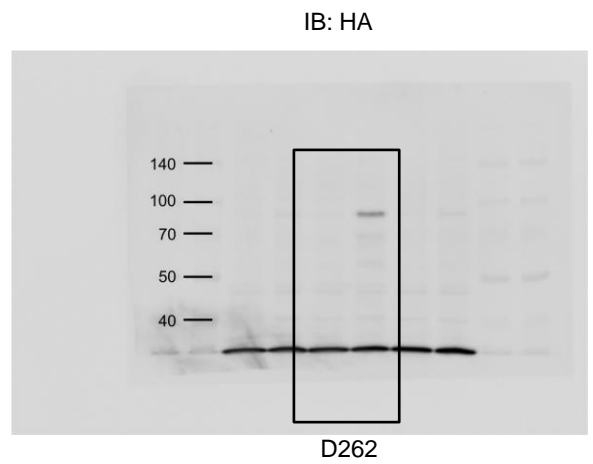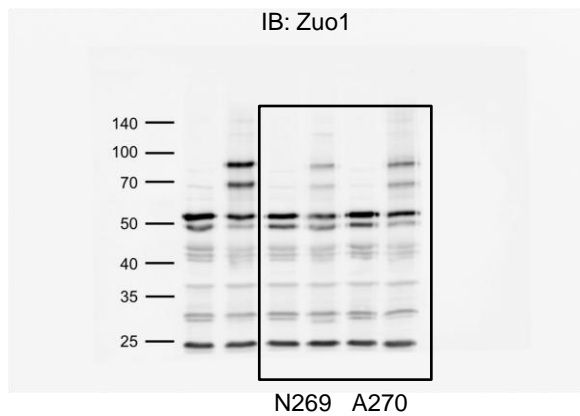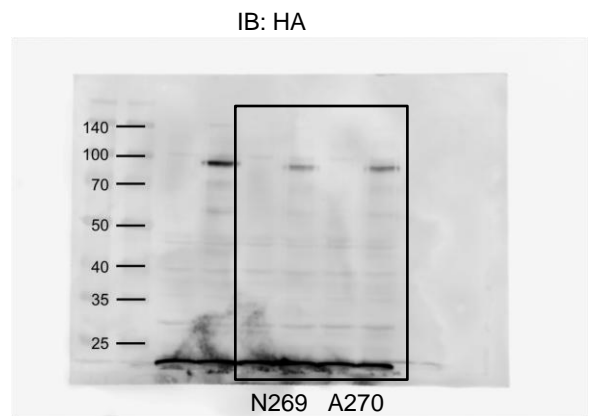

### Supplementary Figure 2c

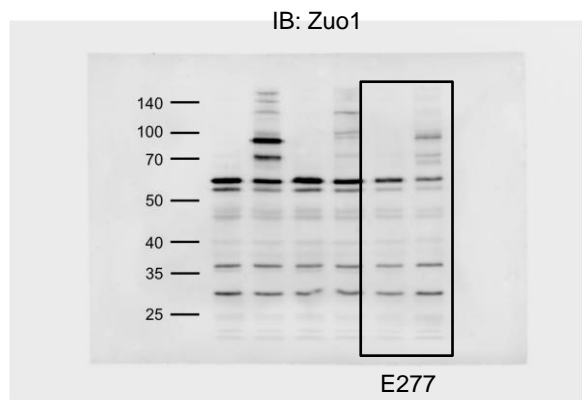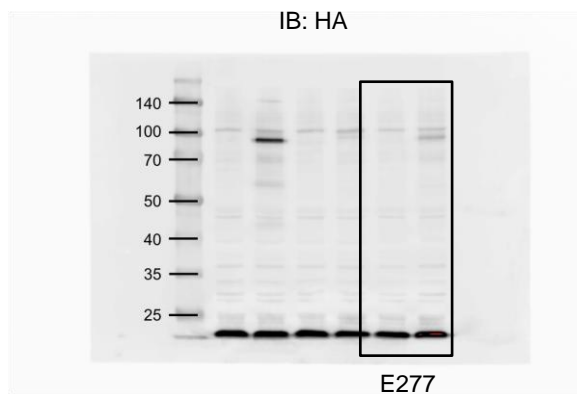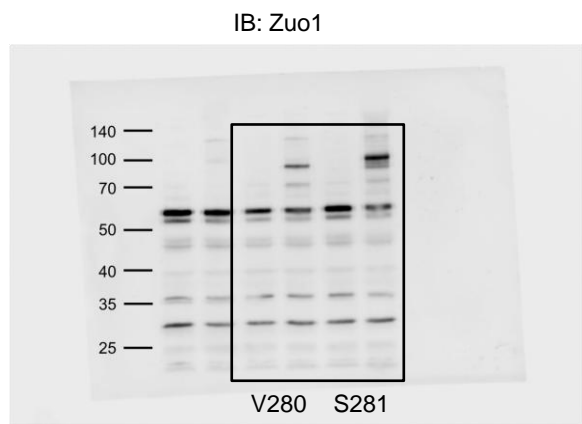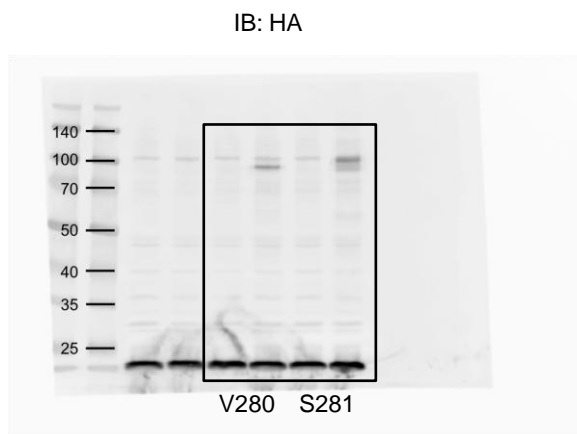

### Supplementary Figure 2d

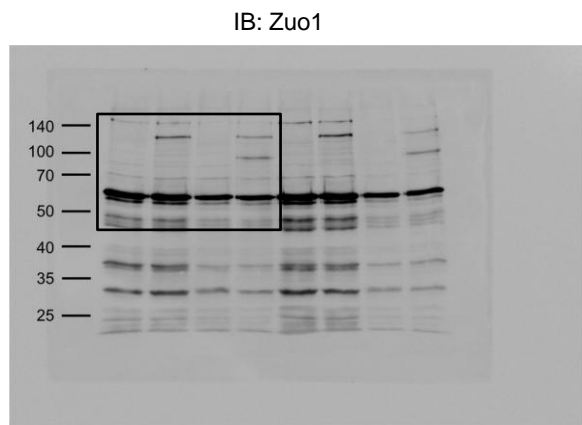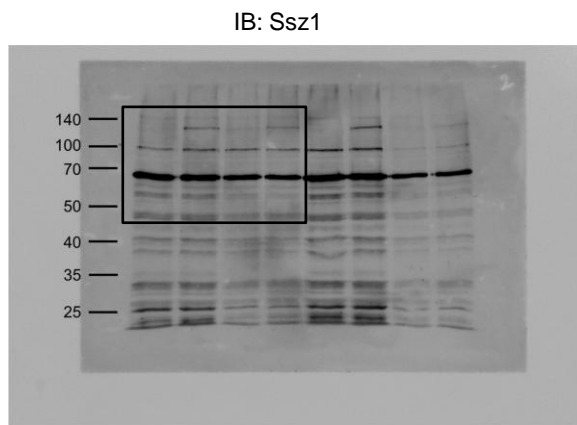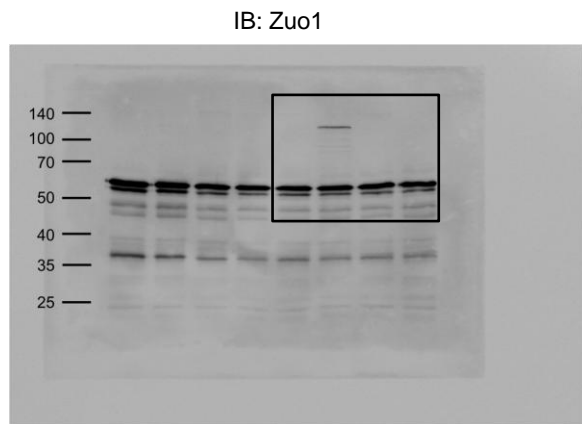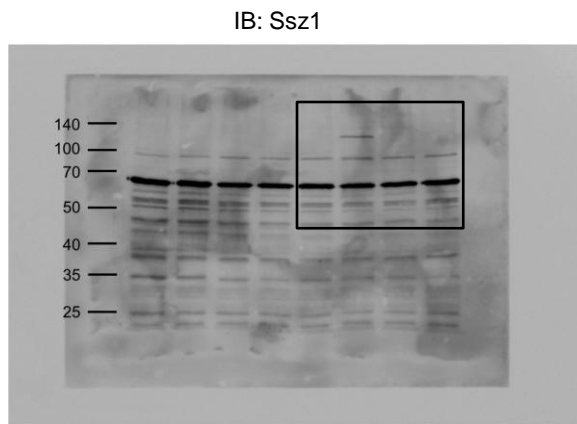

## Supplementary Figure 2e

IB: Zuo1

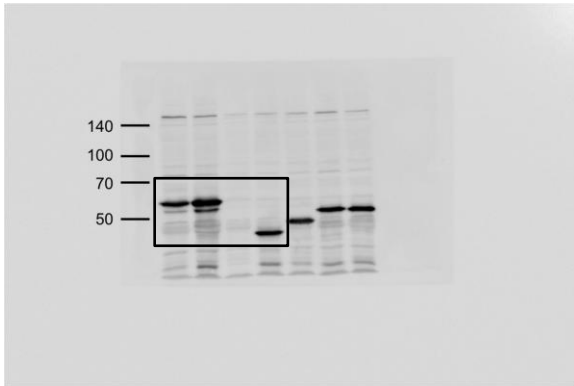

## Supplementary Figure 2f

IB: Zuo1

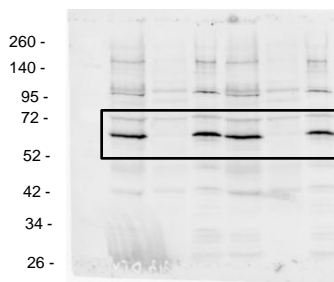

IB: uL3

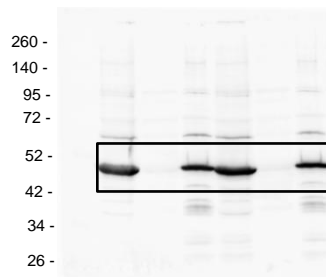

IB: Ssa

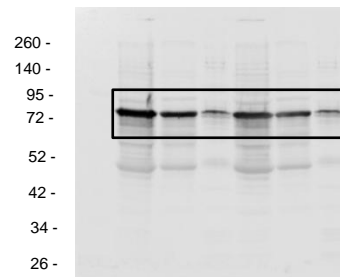

## Supplementary Figure 4b

IB: Zuo1

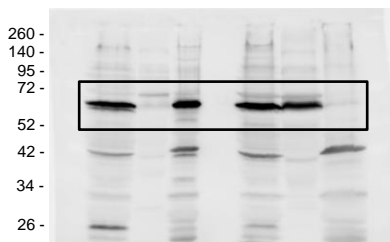

IB: uL3

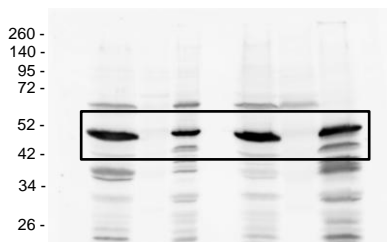

IB: Ssa

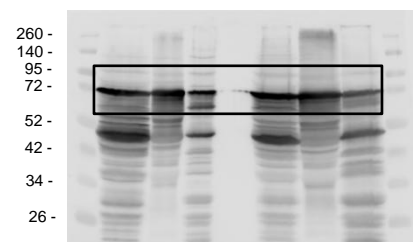

## Supplementary Figure 4c

IB: Zuo1

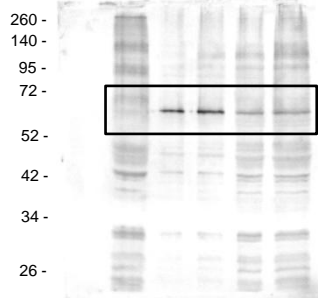

IB: Ssa

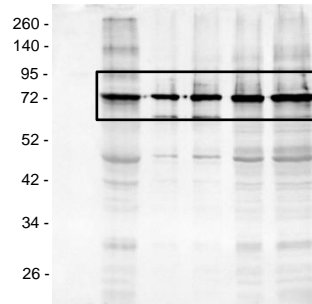

Supplement: NIHMS814512-supplement-3.pdf [file NIHMS814512-supplement-3.pdf]
