# Supplementary material
Source: PubMed Central journal article supplement (PMC5097012)
Supplement: NIHMS814512-supplement-2.pdf [file NIHMS814512-supplement-2.pdf]

## Supplementary Table 1

### Yeast plasmids used in this study

| Plasmid                      | Description                                                                                                                                                                                              | Reference  |
|------------------------------|----------------------------------------------------------------------------------------------------------------------------------------------------------------------------------------------------------|------------|
| pRS315-ZUO1                  | pRS315 carrying <i>ZUO1</i> under control of its native promoter; used as template to generate all Zuo1 variants used in this study unless specified otherwise.                                          | 1          |
| pRS316-ZUO1                  | pRS316 carrying <i>ZUO1</i> under control of its native promoter; used to construct <i>zuo1</i> <sub>Asp262/Thr266/Val273Ala</sub> mutant.                                                               | 1          |
| pRS315-ZUO1 <sub>1-310</sub> | pRS315-ZUO1 with codons 311-433 deleted.                                                                                                                                                                 | This study |
| pRS315-MET3-ZUO1             | <i>ZUO1</i> under control of <i>MET3</i> promoter in pRS315.                                                                                                                                             | This study |
| pRS416-TEF1-RPL31A           | pRS416 carrying <i>RPL31A</i> under the control of <i>TEF1</i> promoter; used to generate pRS416-TEF1-RPL31A-HA.                                                                                         | This study |
| pRS416-TEF1-RPL31A-HA        | pRS416 carrying <i>RPL31A</i> gene with HA-tag coding sequence at its 3'-end, under control of <i>TEF1</i> promoter; used to generate all Bpa <i>RPL31A</i> substitution mutations for crosslinking.     | This study |
| pRS316-RPL22A-HA             | pRS316 with <i>RPL22A-HA</i> tagged gene under the control of its native promoter; used to generate all Bpa <i>RPL22A</i> point mutations for crosslinking.                                              | This study |
| ptRNA-Bpa                    | A 2 micron plasmid encoding a variant tRNA synthetase and tRNA <sub>CUA</sub> for Bpa incorporation; plasmid with either a <i>TRP1</i> or <i>LEU2</i> marker was used.                                   | 2          |
| pRDN-hyg1                    | URA3-based 2 micron plasmid carrying a hygromycin-resistant <i>rDNA</i> repeat under control of its native promoter.                                                                                     | 3          |
| pNOY373                      | A derivative of the 2 micron plasmid YEp351 ( <i>LEU2</i> ) carrying a single copy of <i>rDNA</i> repeat under control of its native promoter; used for generating H24Δ1, H59Δ5 and ES12Δ10.             | 3          |
| pDB688                       | Reporter plasmid carrying a translational fusion of Renilla and firefly luciferase genes under the control of the <i>PGK</i> promoter.                                                                   | 4          |
| pDB688-Stop                  | Test plasmid for readthrough assays; existing CAA codon replaced with TAG stop codon and flanking GAT and ACG codons with CAA in the linker region between luciferase genes in pDB688.                   | This study |
| pDB688-QQQ                   | Control plasmid for readthrough assay; generated by substituting CAA for GAT and ACG codons flanking the existing CAA codon in the linker region between Renilla and firefly luciferase genes in pDB688. | This study |
| pJD375                       | Control plasmid for frameshift assays with Renilla and firefly luciferase genes in frame.                                                                                                                | 5          |
| pYDL-LA                      | Test plasmid for assaying -1 PRF with firefly luciferase gene in -1 frame to Renilla luciferase gene.                                                                                                    | 5          |

### References for Supplementary Table 1

1. Yan, W. et al. Zuo1, a ribosome-associated DnaJ molecular chaperone. *EMBO J* **17**, 4809-17 (1998).
2. Krishnamurthy, M. et al. Caught in the act: covalent cross-linking captures activator-coactivator interactions in vivo. *ACS Chem Biol* **6**, 1321-6 (2011).
3. Wai, H.H., Vu, L., Oakes, M., & Nomura, M. Complete deletion of yeast chromosomal rDNA repeats and integration of a new rDNA repeat: use of rDNA deletion strains for functional analysis of rDNA promoter elements in vivo. *Nucleic Acids Res* **28**, 3524-34 (2000).
4. Salas-Marco, J. & Bedwell, D.M. Discrimination between defects in elongation fidelity and termination efficiency provides mechanistic insights into translational readthrough. *J Mol Biol* **348**, 801-15 (2005).
5. Muldoon-Jacobs, K.L. & Dinman, J.D. Specific effects of ribosome-tethered molecular chaperones on programmed -1 ribosomal frameshifting. *Eukaryot Cell* **5**, 762-70 (2006).
